# Supplementary material for: Metabolic Blockade-Based Genome Mining of Sea Anemone-Associated Streptomyces sp. S1502 Identifies Atypical Angucyclines WS-5995 A–E: Isolation, Identification, Biosynthetic Investigation, and Bioactivities
Source: MDPI journal article supplement (doi:10.3390/md22050195), 2024-04-25
Supplement: s1 [file s1]

## Supporting information

# **Metabolic Blockade-Based Genome Mining of Sea Anemone-Associated *Streptomyces* sp. S1502 Identifies Atypical angucyclines WS-5995A-E: Isolation, Identification, Biosynthetic Investigation and Bioactivities**

Yuyang Wang <sup>1,2</sup>, Le Zhou <sup>1</sup>, Xiaoting Pan<sup>3</sup>, Zhangjun Liao<sup>4</sup>, Nanshan Qi<sup>3</sup>, Mingfei Sun<sup>3</sup>, Hua Zhang<sup>4</sup>, Jianhua Ju <sup>1,2</sup>, Junying Ma <sup>\*1,2</sup>

<sup>1</sup> CAS Key Laboratory of Tropical Marine Bio-Resources and Ecology, RNAM Center for Marine Microbiology, Guangdong Key Laboratory of Marine Materia Medica, South China Sea Institute of Oceanology, Chinese Academy of Sciences, Haizhu District, Guangzhou, Guangdong 510301, China

<sup>2</sup> College of Oceanology, University of Chinese Academy of Sciences, Qingdao 266400, China

<sup>3</sup> Key Laboratory of Livestock Disease Prevention of Guangdong Province, Key Laboratory of Avian Influenza and Other Major Poultry Diseases Prevention and Control, Ministry of Agriculture and Rural Affairs, Institute of Animal Health, Guangdong Academy of Agricultural Sciences, Guangzhou, 510640, China.

<sup>4</sup> Guangdong Provincial Key Laboratory of Medical Molecular Diagnostics, Institute of Laboratory Medicine, Guangdong Medical University, Dongguan 523808, China

**Table S1.** Strains and plasmids used or constructed in this study

| Strains or plasmids                            | Characterization                                                                                                               | Reference or source |
|------------------------------------------------|--------------------------------------------------------------------------------------------------------------------------------|---------------------|
| <b>Strains</b>                                 |                                                                                                                                |                     |
| <i>E. coli</i> BW25113/pIJ790                  | Host strain for homologous reorganization during PCR-targeting process                                                         | <sup>1</sup>        |
| <i>E. coli</i> DH5 $\alpha$ /pIJ773            | Host strain of plasmid pIJ773                                                                                                  | <sup>1</sup>        |
| <i>E. coli</i> ET12567/pUZ8002                 | Donor strain for conjugation with <i>Streptomyces</i>                                                                          | <sup>1</sup>        |
| <i>E. coli</i> ET12567/pUB307                  | Donor strain for conjugation with <i>Streptomyces</i>                                                                          | <sup>1</sup>        |
| <i>Streptomyces</i> sp. S1502                  | The wide-type strain, producer of streptopyrroles                                                                              | This study          |
| $\Delta stp1$                                  | <i>stp1</i> gene deletion mutant                                                                                               | This study          |
| $\Delta stp1/\Delta wsmA$                      | <i>wsmA</i> gene in-frame deletion mutant                                                                                      | This study          |
| $\Delta wsmO/P/Q/R/O_3/X/Y/R_1/R_2/R_3/R_4/XY$ | $\Delta wsmO/P/Q/R/O_3/X/Y/R_1/R_2/R_3/R_4/XY$ gene deletion mutant                                                            | This study          |
| <i>S. atratus</i> SCSIO ZH16NSEP               | Derived from <i>S. atratus</i> SCSIO ZH16; host strain for heterologous expression                                             | This study          |
| <i>S. lividans</i> SBT5                        | Host strain for heterologous expression                                                                                        | This study          |
| <b>Plasmids</b>                                |                                                                                                                                |                     |
| SuperCosI                                      | Amp <sup>r</sup> , Kan <sup>r</sup> , cosmid vector                                                                            |                     |
| pIJ790                                         | Cm <sup>r</sup> , including $\lambda$ -RED ( <i>gam</i> , <i>bet</i> , <i>exo</i> ) for PCR-targeting                          | <sup>1</sup>        |
| pIJ773                                         | Apr <sup>r</sup> , source of <i>acc(3)IV</i> and <i>oriT</i> fragment                                                          | <sup>1</sup>        |
| pUZ8002                                        | Kan <sup>r</sup> , including <i>tra</i> for conjugation                                                                        | <sup>1</sup>        |
| pUB307                                         | Apr <sup>r</sup> , including <i>tra</i> for conjugation                                                                        | <sup>2</sup>        |
| Cosmid 10-11F                                  | Amp <sup>r</sup> , Kan <sup>r</sup> , a cosmid which contains partial streptopyrrole biosynthetic gene cluster                 | This study          |
| Cosmid 13-4D; 13-5D                            | Amp <sup>r</sup> , Kan <sup>r</sup> , a cosmid which contains $\Delta ilaMN$ deleted partial WS-5995 biosynthetic gene cluster | This study          |
| pBAC/1-9A                                      | a cosmid which contains intact <i>wsm</i> biosynthesis cluster                                                                 | This study          |

Abbreviations: Amp<sup>r</sup>, ampicillin resistance; Kan<sup>r</sup>, kanamycin resistance; Apr<sup>r</sup>, apramycin

resistance, Cm<sup>r</sup>, chloramphenicol resistance

**Table S2.** Primers used in this study

| Name                                             | Sequence (5'-3')                                 | Purpose                                                                                |
|--------------------------------------------------|--------------------------------------------------|----------------------------------------------------------------------------------------|
| For screening the cosmid library and BAC library |                                                  |                                                                                        |
| Orf-wsmAa-scF                                    | CGGATCTACCTCGGTGCGG                              | For screening the cosmid library and BAC library; and for verifying right exconjugants |
| Orf-wsmAa-scR                                    | GGTAGATGTTGCCGTGGGCC                             |                                                                                        |
| Orf-wsmAb-scF                                    | GGGGCTCGAGGTTCTCGCAC                             |                                                                                        |
| Orf-wsmAb-scR                                    | CCGGCTCGGTCAGCACCATC                             |                                                                                        |
| Orf-wsmAc-scF                                    | GAGTTCACCGGGCTGGAGGC                             |                                                                                        |
| Orf-wsmAc-scR                                    | GGTTGACGGCGTCCAGGATG                             |                                                                                        |
| Orf-wsmAd-scF                                    | GCTAGGGCTCATCACGTTCG                             |                                                                                        |
| Orf-wsmAd-scR                                    | CGGCTGTACGGTGA CTTCGG                            |                                                                                        |
| Orf-wsmAe-scF                                    | GCATCGAGCGGGACCTGCAC                             |                                                                                        |
| Orf-wsmAd-scR                                    | CCTGAGGGGCTGTGGACGTG                             |                                                                                        |
| For gene replacement                             |                                                  |                                                                                        |
| Del_stp1-F                                       | CCGGACGACCGGCTCTCCAACCACGCGCCGT                  | For in-frame disrupting <i>stp1</i>                                                    |
|                                                  | TCAACTTCactagtATTCCGGGGATCCGTCGACC               |                                                                                        |
| Del_ stp1-R                                      | GACGCAGACGGA A C C C G G T C G A C G A T C A T G |                                                                                        |
|                                                  | TAGGTGGGactagtTGTAGGCTGGAGCTGCTTC                |                                                                                        |
| Del_wsmA-F                                       | GCCAAGAACTTCTGGAGCCTGCTGAGTGAGG                  | For in-frame disrupting <i>wsmA</i>                                                    |
|                                                  | GACGCACGactagtATTCCGGGGATCCGTCGACC               |                                                                                        |
| Del_wsmA-R                                       | GCTGCCGACGGTGAGTACCGTGTCGGTGAGCT                 |                                                                                        |
|                                                  | GGTCGCGactagtTGTAGGCTGGAGCTGCTTC                 |                                                                                        |
| del_wsmX-F                                       | GCCTGGTACACCGTCGGCGAGCACC ACTTC                  | For disrupting <i>wsmX</i> and <i>wsmXY</i>                                            |
|                                                  | GGTGAGCGGATTCCGGGGATCCGTCGACC                    |                                                                                        |
| del_wsmX-R                                       | CAGGTGCAGGTCGTGGCCCCACAGCTCGTG                   |                                                                                        |
|                                                  | CAGGCGCCCTGTAGGCTGGAGCTGCTTC                     |                                                                                        |
| del_wsmY-F                                       | GTCTGGGTCGACGTCGACACGGTCCTGTCC                   | For disrupting <i>wsmY</i> and <i>wsmXY</i>                                            |
|                                                  | GCCCCGCCCATTCGGGGATCCGTCGACC                     |                                                                                        |

---

|                                  |                                                                 |                                            |
|----------------------------------|-----------------------------------------------------------------|--------------------------------------------|
| del_ <i>wsmY</i> -R              | GCAGGCGGTGACTCCGCTGCCGCAGTAGAC<br>GACGACGTCTGTAGGCTGGAGCTGCTTC  |                                            |
| del_ <i>wsmO</i> <sub>3</sub> -F | GCGGTGATCGCCGCGTCCACCACGCGTGTA<br>CGGGTCTTCATTCCGGGGATCCGTCGACC | For disrupting<br><i>wsmO</i> <sub>3</sub> |
| del_ <i>wsmO</i> <sub>3</sub> -R | CAGGCTCAGCCGCTGGATCTCCGCTCGCGC<br>GTCCTGTAGGCTGGAGCTGCTTC       |                                            |
| del_ <i>wsmR</i> <sub>1</sub> -F | CTGCCGTCGTACCTCGCCGGGCACGTGGCG<br>CGCATCGGCATTCCGGGGATCCGTCGACC | For disrupting                             |
| del_ <i>wsmR</i> <sub>1</sub> -R | CCGTTCCCTCGGGGGTGAAGCAGCCGAGGA<br>AGGAGTCCTGTGTAGGCTGGAGCTGCTTC | <i>wsmR</i> <sub>1</sub>                   |
| del_ <i>wsmR</i> <sub>2</sub> -F | GACGGCCTCGAGGTGTGCAAGGCCATCCGC<br>GCCGTCAGCATTCGGGGATCCGTCGACC  | For disrupting                             |
| del_ <i>wsmR</i> <sub>2</sub> -R | GCGGAGGCTGCTGACGTGGGTGTCGACGGT<br>CCGCCGGGATGTAGGCTGGAGCTGCTTC  | <i>wsmR</i> <sub>2</sub>                   |
| del_ <i>wsmO</i> -F              | CCCTTTCCCGGCAAGGTGGTGATCCGGTCG<br>GTGGCGCTCATTCGGGGATCCGTCGACC  | For disrupting                             |
| del_ <i>wsmO</i> -R              | GGCGTAGTAGCCGTCGGGGCGGATCAGGAG<br>CGCCTCGTCTGTAGGCTGGAGCTGCTTC  | <i>wsmO</i>                                |
| del_ <i>wsmP</i> -F              | GCGGACGTCGCGGACGACACGGCGAAGGC<br>GGCCGCCGAGATTCCGGGGATCCGTCGACC | For disrupting                             |
| del_ <i>wsmP</i> -R              | CTGGCTCACGTCCTGCGGAGTACCGAGGCG<br>CGGGATCAGTGTAGGCTGGAGCTGCTTC  | <i>wsmP</i>                                |
| del_ <i>wsmQ</i> -F              | GCGGCCCTGCGCGGGCTGGTCGACGAGGA<br>ATGGGCCCGGATTCCGGGGATCCGTCGACC | For disrupting                             |
| del_ <i>wsmQ</i> -R              | CGAGGCACCGCCGGTCGAGCCCAGCGGCA<br>CGAGCACCGCTGTAGGCTGGAGCTGCTTC  | <i>wsmQ</i>                                |
| del_ <i>wsmR</i> -F              | GGGGTCAACCCGGTCGACTGGAAACGCCGT<br>TCGGGCCGCATTCCGGGGATCCGTCGACC | For disrupting<br><i>wsmR</i>              |

---

|                                  |                                                                 |                                                   |
|----------------------------------|-----------------------------------------------------------------|---------------------------------------------------|
| del_ <i>wsmR</i> -R              | CACGACCGCGCCCAGGATCGCCGGGTCGCG<br>CACCGGCCCTGTAGGCTGGAGCTGCTTC  |                                                   |
| del_ <i>wsmR</i> <sub>3</sub> -F | GCGAAACGCCGGGCCATCACCCAAGGCGC<br>GCGTGCCGTCATTCCGGGGATCCGTCGACC | For disrupting                                    |
| del_ <i>wsmR</i> <sub>3</sub> -R | GACGAAGTGGAGGGTGGCCCCGGGCGGGGC<br>TGGAGATGTGTGTAGGCTGGAGCTGCTTC | <i>wsmR</i> <sub>3</sub>                          |
| del- <i>wsmR</i> <sub>4</sub> -F | GACAAGGGCTACGACGCCATGACCGTCGGC<br>GACATCGCCATTCCGGGGATCCGTCGACC | For disrupting                                    |
| del- <i>wsmR</i> <sub>4</sub> -R | GGCGTGGTAGAAGGTCCGTTCGATCATCCA<br>GCACAGGGCTGTAGGCTGGAGCTGCTTC  | <i>wsmR</i> <sub>4</sub>                          |
| <b>For verifying the mutants</b> |                                                                 |                                                   |
| ID_stp1-F                        | GAACCTCCGACATCCAGCGC                                            | For verifying the                                 |
| ID_stp1-R                        | TGACCAGCCCACGCCTG                                               | disruption of $\Delta$ <i>stp1</i>                |
| ID-wsmX-F                        | GCTAGGGCTCATCACGTTTCG                                           | For verifying                                     |
| ID-wsmX-R                        | GCGGCGGTCAGTTCGGTG                                              | $\Delta$ <i>wsmX</i> and<br>$\Delta$ <i>wsmXY</i> |
| ID-wsmY-F                        | GACGCCGGATGGGTGAGCG                                             | For verifying                                     |
| ID-wsmY-R                        | GGACAGGTCCGTGGACCAGG                                            | $\Delta$ <i>wsmY</i> and<br>$\Delta$ <i>wsmXY</i> |
| ID- <i>wsmR</i> <sub>4</sub> -F  | GGCCACCACCCCGCACGAAG                                            | For verifying                                     |
| ID- <i>wsmR</i> <sub>4</sub> -R  | GATGTGTTTCGCATGTCGCCG                                           | $\Delta$ <i>wsmR</i> <sub>4</sub>                 |
| ID- <i>wsmO</i> <sub>3</sub> -F  | CGTGCCGGACCACCCCTAC                                             | For verifying                                     |
| ID- <i>wsmO</i> <sub>3</sub> -R  | CAGCACCTGGATGACGTGGTG                                           | $\Delta$ <i>wsmO</i> <sub>3</sub>                 |
| ID- <i>wsmR</i> <sub>1</sub> -F  | CGGTCCGCTGTTTCGGAGC                                             | For verifying                                     |
| ID- <i>wsmR</i> <sub>1</sub> -R  | GTGGTCACTCGGCGCACG                                              | $\Delta$ <i>wsmR</i> <sub>1</sub>                 |
| ID- <i>wsmR</i> <sub>2</sub> -F  | GCGTGGACCTCGTCCTGATGG                                           | For verifying                                     |
| ID- <i>wsmR</i> <sub>2</sub> -R  | GCCGCGTACGGTGACGACC                                             | $\Delta$ <i>wsmR</i> <sub>2</sub>                 |
| ID- <i>wsmO</i> -F               | CGAAGGGCATCAGCAACCTG                                            | For verifying                                     |
| ID- <i>wsmO</i> -R               | GGGATGGTCTGCGTTCGGCC                                            | $\Delta$ <i>wsmO</i>                              |

---

|                                 |                       |                    |
|---------------------------------|-----------------------|--------------------|
| ID- <i>wsmP</i> -F              | GTCGAACGGAACGCAGTCCC  | For verifying      |
| ID- <i>wsmP</i> -R              | GGCCGAACGCAGACCATCCC  | $\Delta wsmP$      |
| ID- <i>wsmQ</i> -F              | CGGATACGGAGGGTCTGCAC  | For verifying      |
| ID- <i>wsmQ</i> -R              | CACGGGGCTTGTGGAAGGTC  | $\Delta wsmQ$      |
| ID- <i>wsmR</i> -F              | GCCAGACAGAGACGTCGAGG  | For verifying      |
| ID- <i>wsmR</i> -R              | GCCCGCTCGAACGGGATCAC  | $\Delta wsmR$      |
| ID- <i>wsmR</i> <sub>3</sub> -F | GCTGCATGGCAATTCGGCCG  | For verifying      |
| ID- <i>wsmR</i> <sub>3</sub> -R | GGAGCGCGGCTGGTGTAGG   | $\Delta wsmR_4$    |
| ID- <i>wsmR</i> <sub>4</sub> -F | GGCCACCACCCCGCACGAAG  | For verifying      |
| ID- <i>wsmR</i> <sub>4</sub> -R | GATGTGTTTCGCATGTCGCCG | $\Delta wsmR_{44}$ |

---

**Table S3.** Media used in this study

| Medium name | Ingredient                                                                                                                                                                                                                                                                                                 |
|-------------|------------------------------------------------------------------------------------------------------------------------------------------------------------------------------------------------------------------------------------------------------------------------------------------------------------|
| ISP-4       | 1% soluble starch, 0.1% bacteria peptone, 0.05% yeast extract, 0.1% K <sub>2</sub> HPO <sub>4</sub> , 0.1% MgSO <sub>4</sub> ·7H <sub>2</sub> O, 0.2% (NH <sub>4</sub> ) <sub>2</sub> SO <sub>4</sub> , 0.1% NaCl, 0.01% trace element solution, 3% artificial sea salt, 2% CaCO <sub>3</sub> , pH 7.2–7.4 |
| MS          | 2% mannitol, 2% soybean powder, 1.5% agar, 3% artificial sea salt, and 0.2% CaCO <sub>3</sub> , pH 7.2–7.4                                                                                                                                                                                                 |
| RA          | 2% soluble starch, 0.5% corn flour, 1% malt extract, 1% glucose, 1% maltose, 0.01% trace elements, 3% artificial sea salt, and 0.2% CaCO <sub>3</sub> , pH 7.2–7.4 (3% XAD-16 resins)                                                                                                                      |
| LB          | 0.5% yeast extract, 1% Tryptone, 1% NaCl, pH 7.2–7.4                                                                                                                                                                                                                                                       |



**Table S4.** antiSMASH prediction of biosynthetic gene clusters in *Streptomyces* sp. S1502.

| BGC | BGC type                | Compounds           | Similarity (%) |
|-----|-------------------------|---------------------|----------------|
| 1   | T1PKS                   | limazepine          | 11             |
| 2   | NRPS                    | coelibactin         | 100            |
| 3   | indole                  | 7-prenylisatin      | 33             |
| 4   | terpene                 | isorenieratene      | 62             |
| 5   | NRPS                    | paenibactin         | 83             |
| 6   | T3PKS                   | germicidin          | 100            |
| 7   | T1PKS                   | sceliphrolactam     | 56             |
| 8   | T3PKS                   | herboxidiene        | 8              |
| 9   | ectoine                 | ectoine             | 100            |
| 10  | melanin                 | melanin             | 60             |
| 11  | T1PKS                   | pyrrolomycin        | 37             |
| 12  | siderophore             | desferrioxamin      | 83             |
| 13  | RRE-containing          | naphthomycin A      | 9              |
| 14  | terpene                 | albaflavenone       | 100            |
| 15  | T2PKS                   | spore pigment       | 66             |
| 16  | siderophore             | -                   | -              |
| 17  | T2PKS; NRPS             | WS-5995/friulimicin | 69/75          |
| 18  | Ripp-like               | -                   | -              |
| 19  | terpene                 | geosmin             | 100            |
| 20  | siderophore             | -                   | -              |
| 21  | NRPS; T1PKS             | $\alpha$ -lipomycin | 100            |
| 22  | PKS                     | leinamycin          | 15             |
| 23  | lanthipeptide-class-iii | SapB                | 100            |
| 24  | terpene                 | hopene              | 100            |
| 25  | Ripp-like               | informatipeptin     | 42             |
| 26  | NRPS                    | coelichelin         | 100            |
| 27  | ranthipeptide           | -                   | -              |

**Table S5.** Deduced functions of ORFs of *wsm* gene cluster in *Streptomyces* sp. SCSIO S1502.

| ORF                     | size <sup>a</sup> | Proposed function                           | Protein homologue and origin                                      | ID/SI <sup>b</sup> |
|-------------------------|-------------------|---------------------------------------------|-------------------------------------------------------------------|--------------------|
| <i>wsmR<sub>4</sub></i> | 202               | TetR family transcriptional regulator       | ARP51756.1 ( <i>Streptomyces</i> sp. SCSIO 03032)                 | 39/67              |
| <i>wsmO<sub>1</sub></i> | 280               | KR; short-chain dehydrogenase/reductase SDR | TtmK ( <i>Streptomyces afghaniensis</i> )                         | 42/53              |
| <i>wsmU</i>             | 107               | Polyketide synthesis cyclase                | WsdU ( <i>Streptomyces yanglinensis</i> CGMCC 4.2023)             | 77/83              |
| <i>wsmA</i>             | 421               | Beta-ketoacyl synthase                      | WsdA ( <i>Streptomyces yanglinensis</i> CGMCC 4.2023)             | 84/89              |
| <i>wsmB</i>             | 405               | Beta-ketoacyl synthase/CLF                  | WsdB ( <i>Streptomyces yanglinensis</i> CGMCC 4.2023)             | 74/82              |
| <i>wsmC</i>             | 87                | ACP                                         | WsdC ( <i>Streptomyces yanglinensis</i> CGMCC 4.2023)             | 65/75              |
| <i>wsmD</i>             | 260               | KR; C9                                      | WsdD ( <i>Streptomyces yanglinensis</i> CGMCC 4.2023)             | 80/86              |
| <i>wsmE</i>             | 313               | CYC C7-C12                                  | WsdE ( <i>Streptomyces yanglinensis</i> CGMCC 4.2023)             | 67/76              |
| <i>wsmF</i>             | 442               | monooxygenase FAD-binding                   | WsdF ( <i>Streptomyces yanglinensis</i> CGMCC 4.2023)             | 55/62              |
| <i>wsmI</i>             | 227               | putative_anthrone_monooxygenase             | WsdI ( <i>Streptomyces yanglinensis</i> CGMCC 4.2023)/JadG/GilOII | 69/81<br>(71/85)   |
| <i>wsmO<sub>2</sub></i> | 494               | monooxygenase FAD-binding                   | WsdT ( <i>Streptomyces yanglinensis</i> CGMCC 4.2023)             | 59/69              |
| <i>wsmG</i>             | 148               | nuclear transport factor 2 family protein   | WsdG ( <i>Streptomyces yanglinensis</i> CGMCC 4.2023)             | 40/53              |
| <i>wsmH</i>             | 338               | O-methyltransferase                         | WsdH ( <i>Streptomyces yanglinensis</i> CGMCC 4.2023)             | 65/76              |
| <i>wsmJ</i>             | 302               | oxidoreductase                              | WsdJ ( <i>Streptomyces yanglinensis</i> )                         | 60/73              |

|                         |     |                                                                        |                                                            |       |
|-------------------------|-----|------------------------------------------------------------------------|------------------------------------------------------------|-------|
|                         |     |                                                                        | CGMCC 4.2023)                                              |       |
| <i>wsmK</i>             | 531 | extracellular solute-binding protein<br>family 5                       | WsdK ( <i>Streptomyces yanglinensis</i><br>CGMCC 4.2023)   | 37/50 |
| <i>wsmL</i>             | 317 | binding-protein-dependent<br>transport systems                         | WsdL ( <i>Streptomyces yanglinensis</i><br>CGMCC 4.2023)   | 44/60 |
| <i>wsmM</i>             | 288 | binding-protein-dependent<br>transport systems                         | WsdM ( <i>Streptomyces yanglinensis</i><br>CGMCC 4.2023)   | 41/58 |
| <i>wsmN</i>             | 611 | ABC transporter ATP-binding<br>protein                                 | WsdN ( <i>Streptomyces yanglinensis</i><br>CGMCC 4.2023)   | 54/66 |
| <i>wsmX</i>             | 347 | luciferase family protein/LLM class<br>flavin-dependent oxidoreductase | OvmZ ( <i>Streptomyces olivaceus</i><br>SCSIO T05)         | 41/51 |
| <i>wsmY</i>             | 268 | putative rhodanese domain-<br>containing protein                       | AWR88429.1 ( <i>Streptomyces</i><br><i>filamentosus</i> )  | 51/61 |
| <i>wsmO<sub>3</sub></i> | 538 | oxidoreductase                                                         | HrbZ1 ( <i>Streptomyces</i> sp. 2238-<br>SVT4)             | 41/52 |
| <i>wsmZ</i>             | 480 | Drug resistance transporter,<br>EmrB/QacA                              | BAB69179.1 ( <i>Streptomyces</i><br><i>avermitilis</i> )   | 42/60 |
| <i>wsmR<sub>1</sub></i> | 161 | transcriptional regulator, MarR<br>family                              | StfRIII ( <i>Streptomyces</i><br><i>steffisburgensis</i> ) | 39/50 |
| <i>wsmR<sub>2</sub></i> | 249 | response regulator                                                     | WP_237282926.1 ( <i>Streptomyces</i> sp.<br>PKU-MA00045)   | 71/82 |
| <i>wsmO</i>             | 476 | monooxygenase FAD-binding                                              | WsdO ( <i>Streptomyces yanglinensis</i><br>CGMCC 4.2023)   | 77/83 |
| <i>wsmP</i>             | 265 | KR                                                                     | WsdP ( <i>Streptomyces yanglinensis</i><br>CGMCC 4.2023)   | 84/88 |
| <i>wsmQ</i>             | 362 | pyridine nucleotide-disulfide<br>oxidoreductase                        | WsdQ ( <i>Streptomyces yanglinensis</i><br>CGMCC 4.2023)   | 74/84 |
| <i>wsmR</i>             | 300 | crotonyl-CoA reductase / alcohol<br>dehydrogenase                      | WsdR ( <i>Streptomyces yanglinensis</i><br>CGMCC 4.2023)   | 82/86 |

|                          |     |                                          |                                                                     |       |
|--------------------------|-----|------------------------------------------|---------------------------------------------------------------------|-------|
| <i>wsmR</i> <sub>3</sub> | 241 | TetR family transcriptional<br>regulator | BexR2 ( <i>Amycolatopsis orientalis</i><br>subsp. <i>vinearia</i> ) | 48/59 |
|--------------------------|-----|------------------------------------------|---------------------------------------------------------------------|-------|

---

a: amino acid length; b: identity/similarity

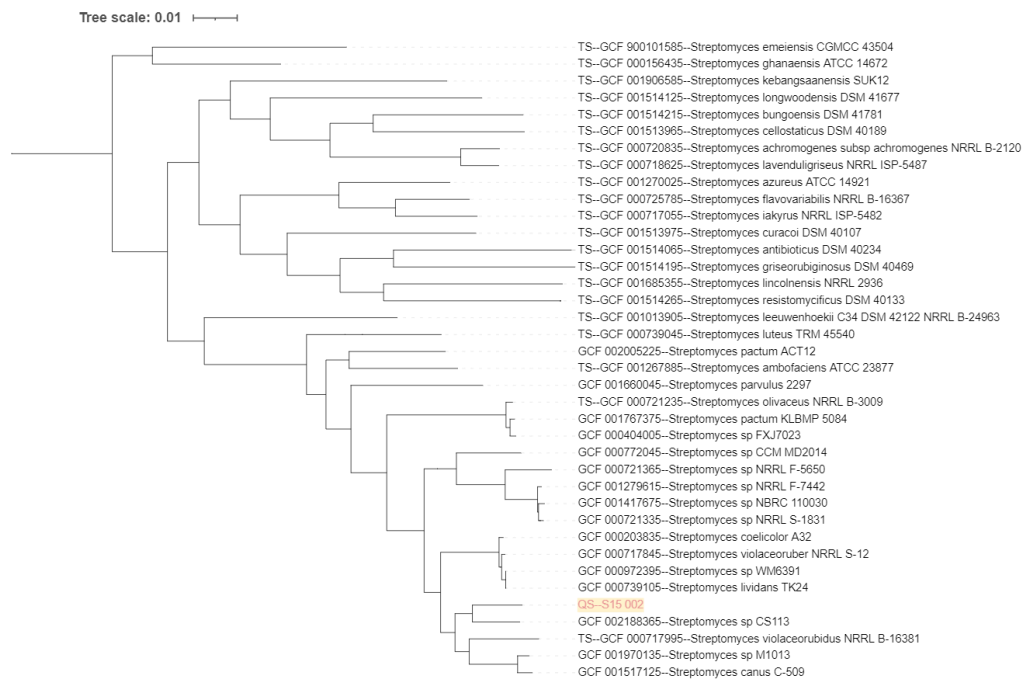

**Figure S1** Phylogenetic analysis of *Streptomyces* sp. S1502 using autoMLST

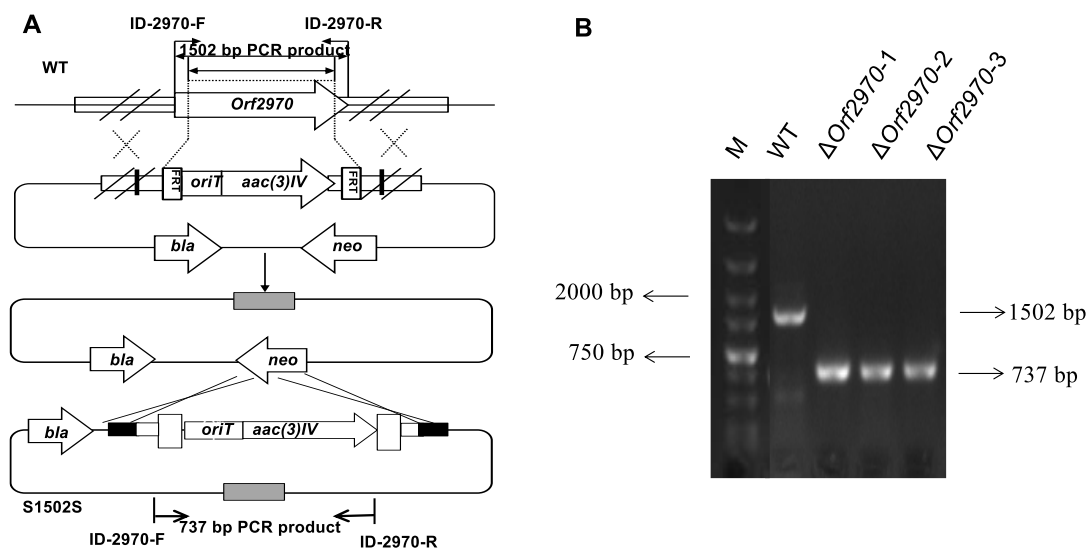

**Figure S2.** Disruption of *stp1* in wild type *S. sp.* S1502 via PCR-targeting. (A) Schematic representation for disruption of *stp1*. (B) PCR analyses of the WT strain and the *stp1* double-cross mutant carried out using the primers listed in Table S2. M: DNA molecular ladder; WT: using the genomic DNA of *S. sp.* S1502 as template;  $\Delta$ Orf2970-1-3: using the genomic DNA of *stp1* mutant as template.

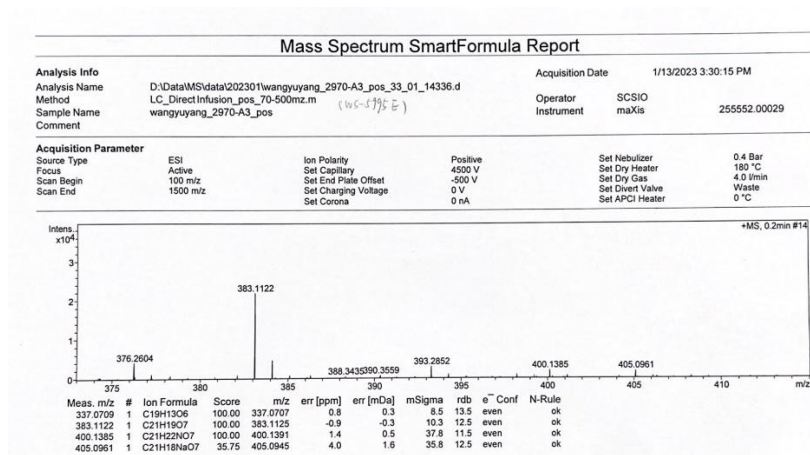

**Figure S3.** HE-ESI-MS spectrum of WS-5995 E (1)

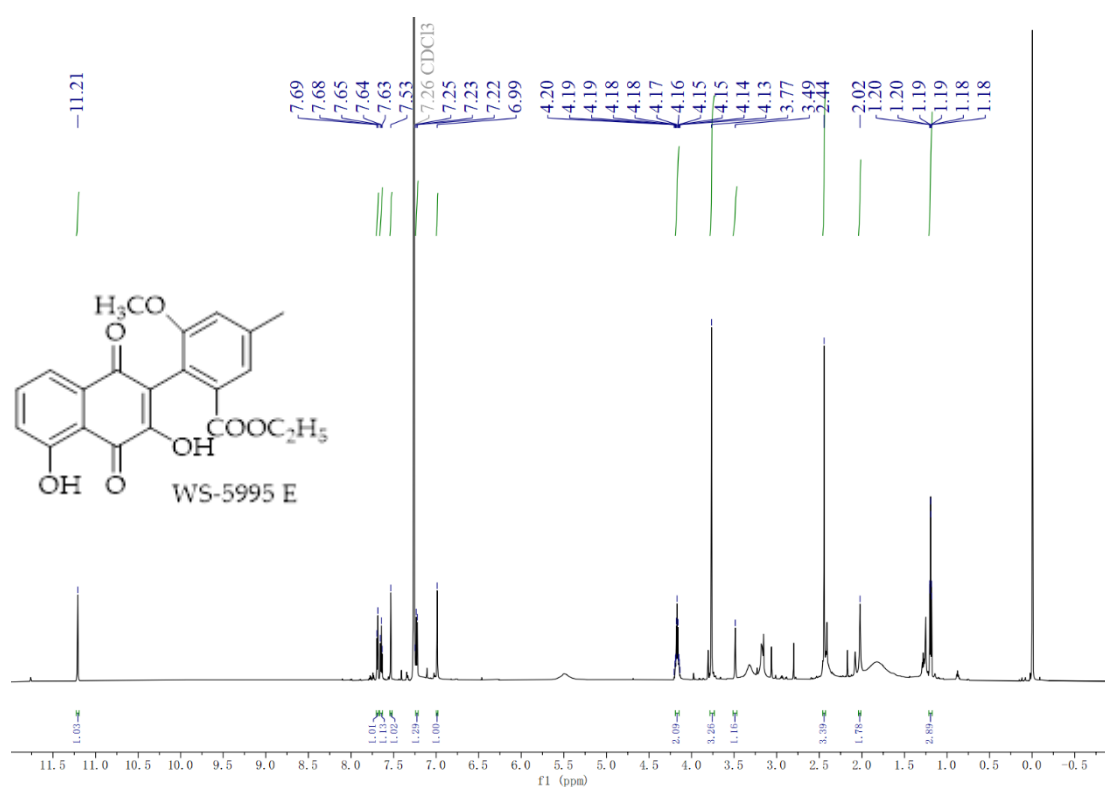

**Figure S4.** <sup>1</sup>H NMR (500 MHz, CDCl<sub>3</sub>) spectrum of WS-5995 E (1).

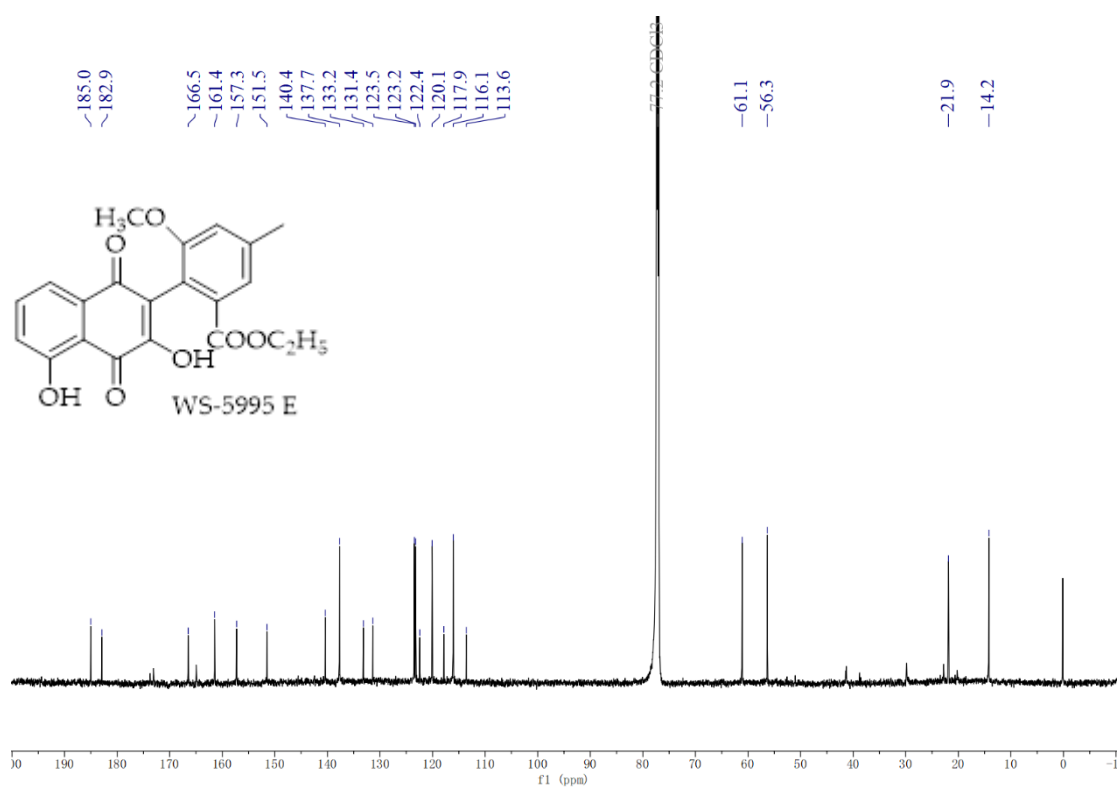

**Figure S5.** <sup>13</sup>C NMR (125 MHz, CDCl<sub>3</sub>) spectrum of WS-5995 E (1).

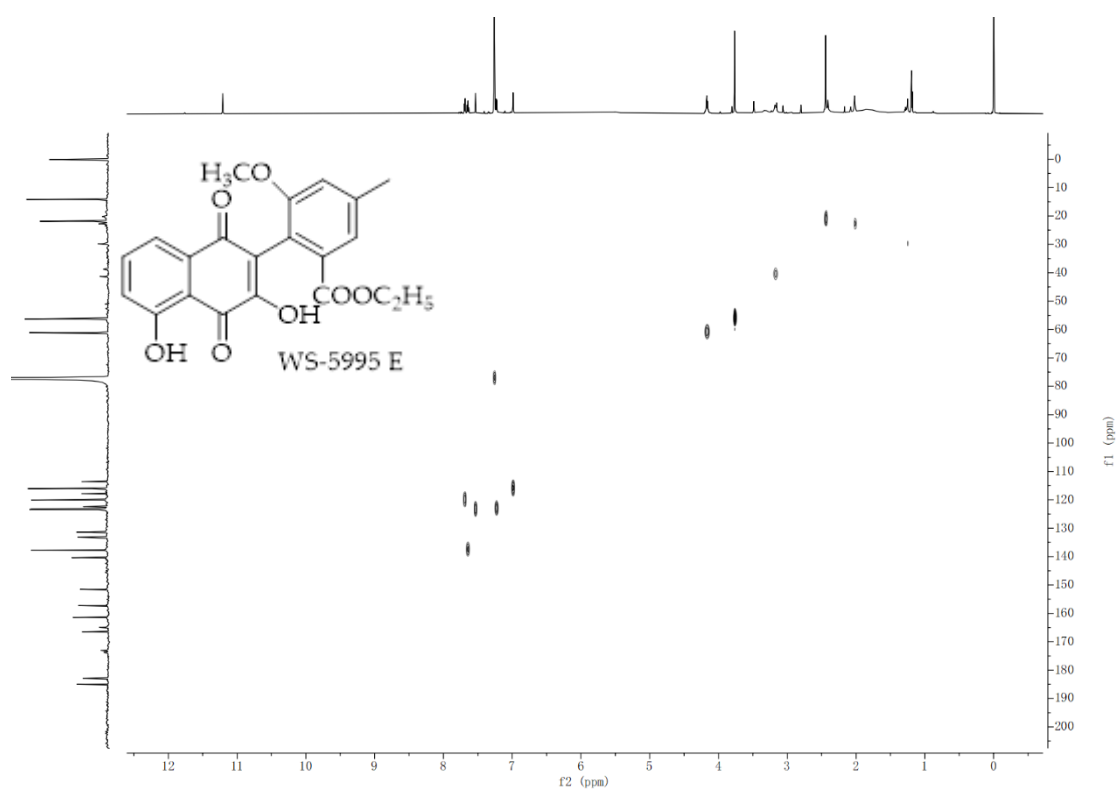

**Figure S6.** HMBC (500 MHz, CDCl<sub>3</sub>) spectrum of WS-5995 E (1).

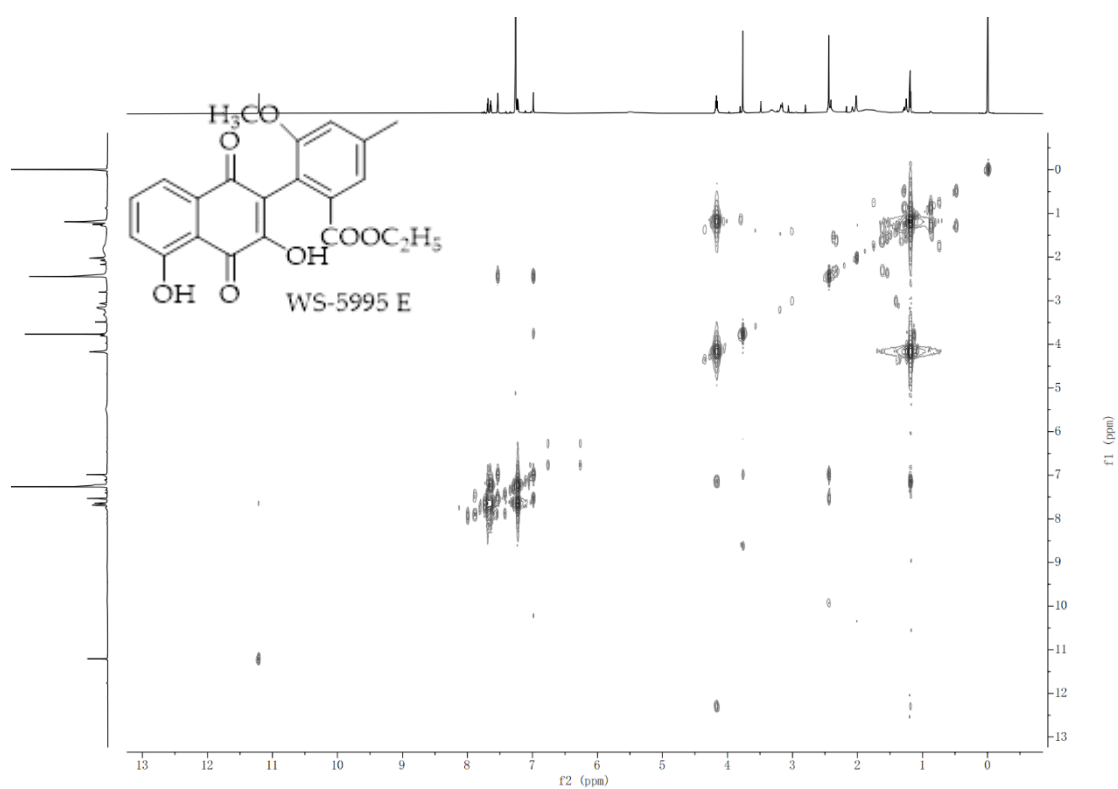

**Figure S7.** COSY (500 MHz, CDCl<sub>3</sub>) spectrum of WS-5995 E (1).

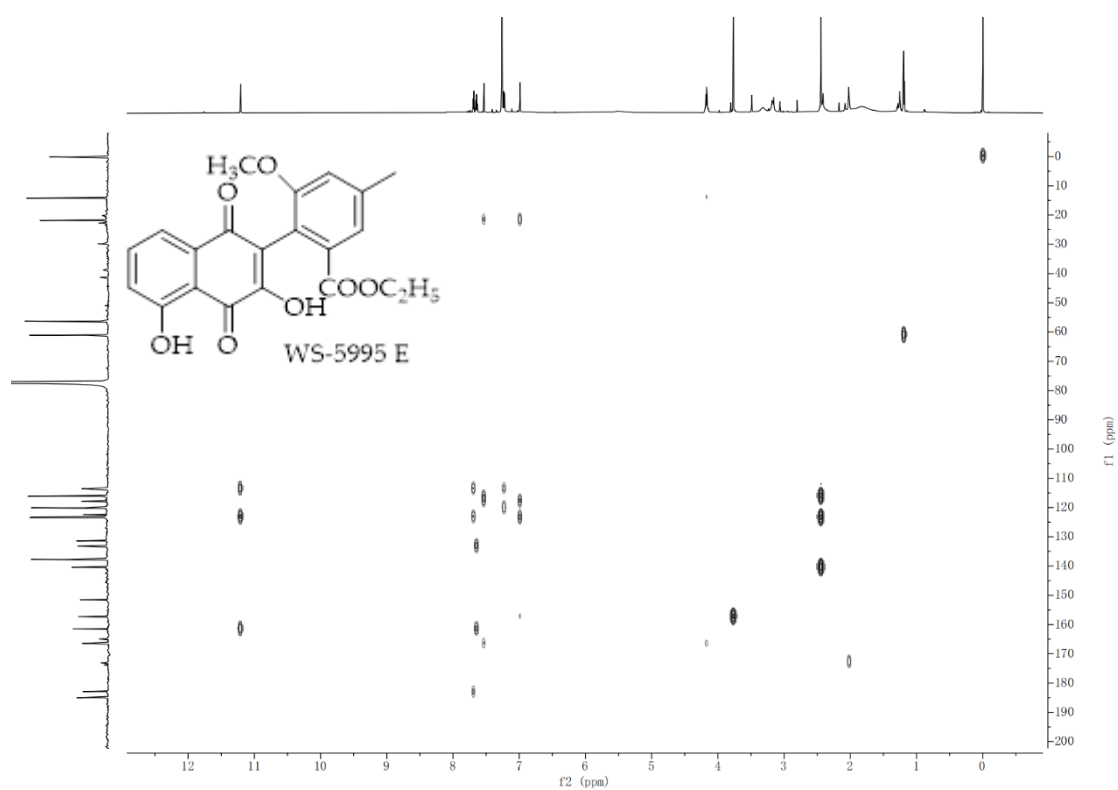

**Figure S8.** HSQC (500 MHz, CDCl<sub>3</sub>) spectrum of WS-5995 E (1).



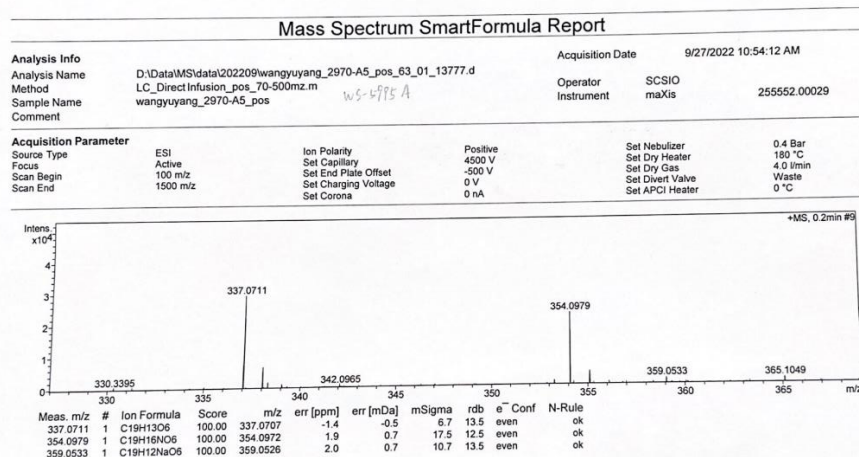

**Figure S9.** HE-ESI-MS spectrum of WS-5995 A (2)

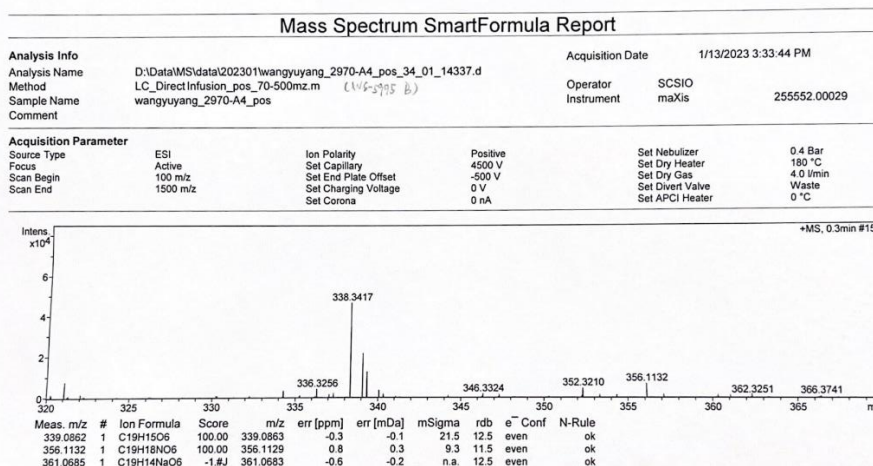

**Figure S10.** HE-ESI-MS spectrum of WS-5995 B (3)

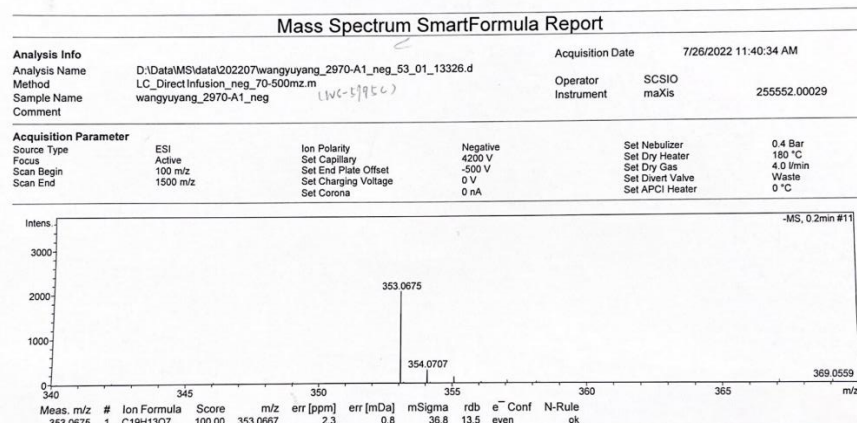

**Figure S11.** HE-ESI-MS spectrum of WS-5995 C (4)

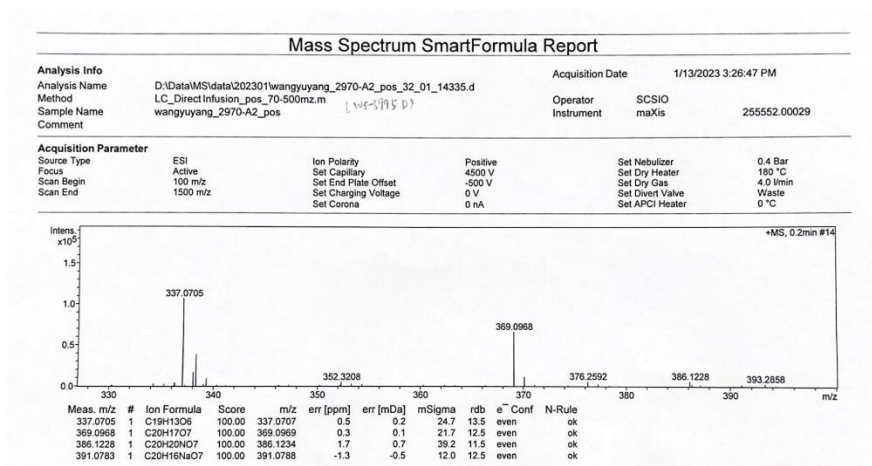

**Figure S12.** HE-ESI-MS spectrum of WS-5995 D (5)

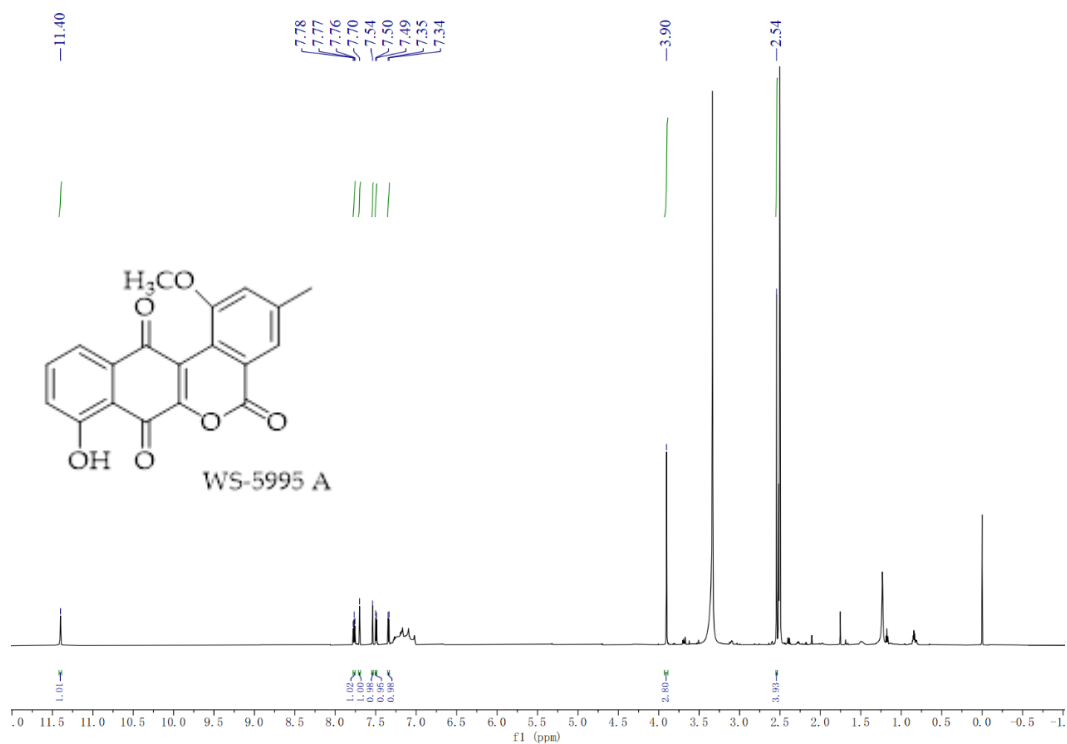

**Figure S13.** <sup>1</sup>H NMR (700 MHz, DMSO-*d*<sub>6</sub>) spectrum of WS-5995 A (2).

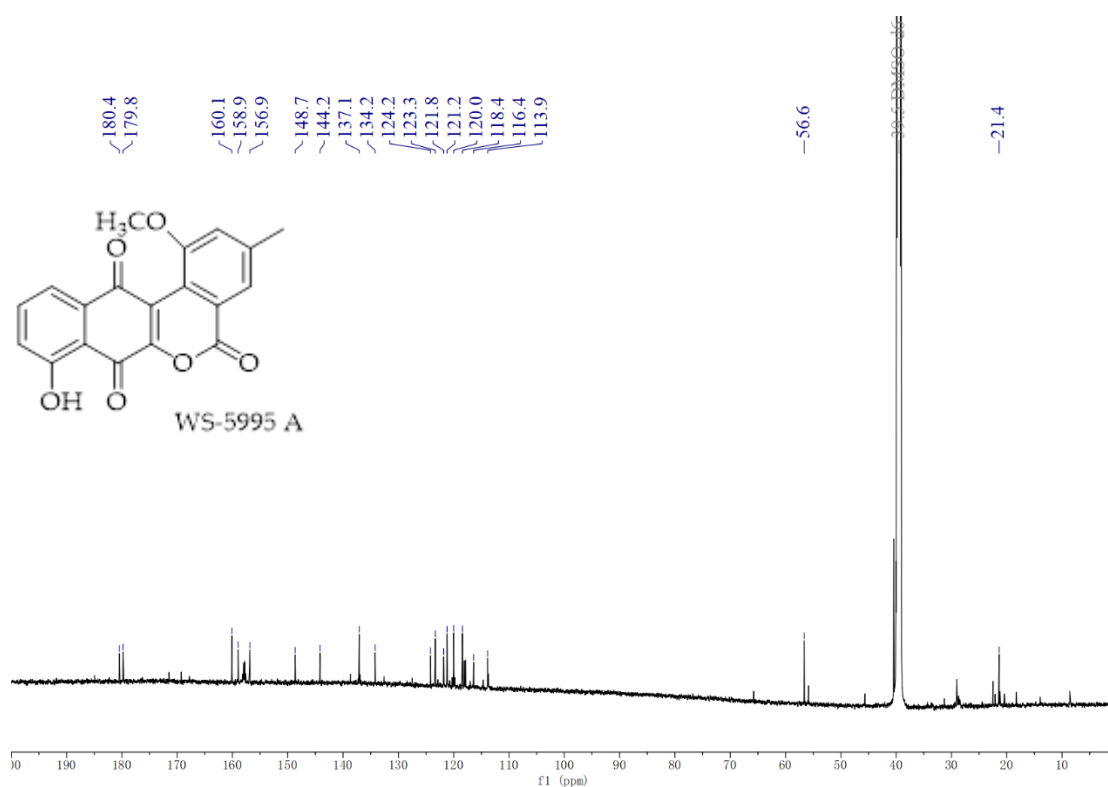

**Figure S14.** <sup>13</sup>C NMR (175 MHz, DMSO-*d*<sub>6</sub>) spectrum of WS-5995 A (2).

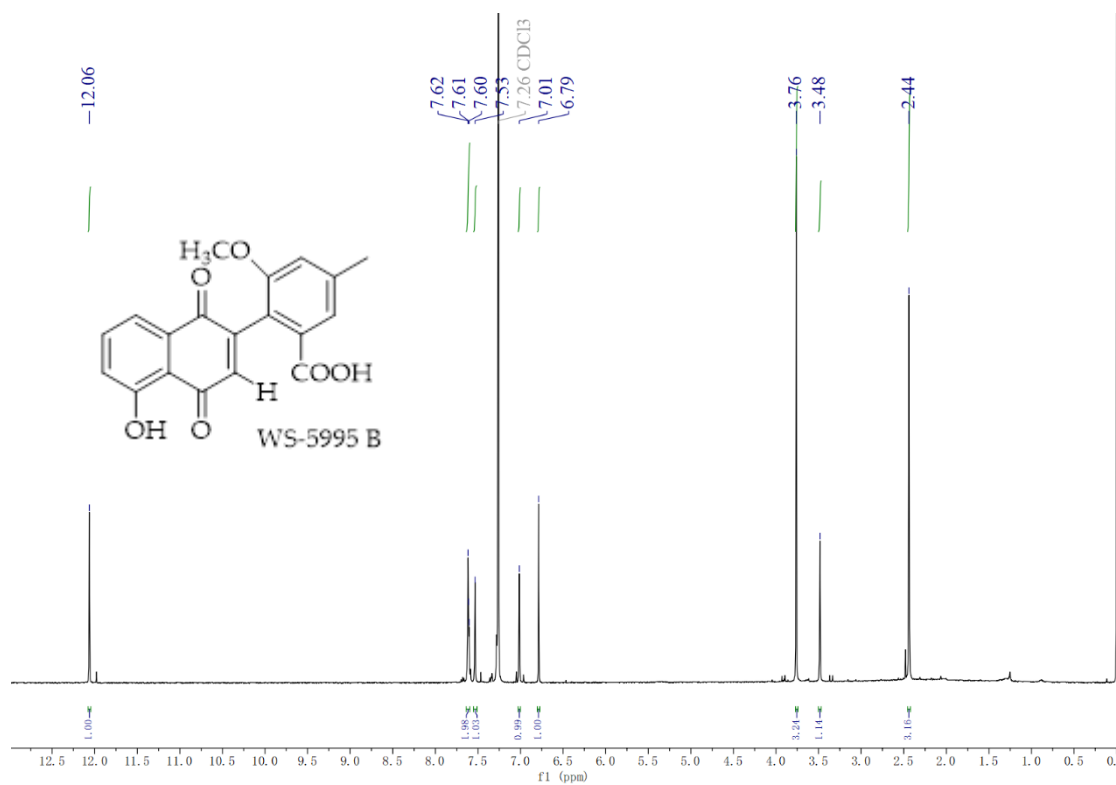

**Figure S15.** <sup>1</sup>H NMR (700 MHz, CDCl<sub>3</sub>) spectrum of WS-5995 B (3).

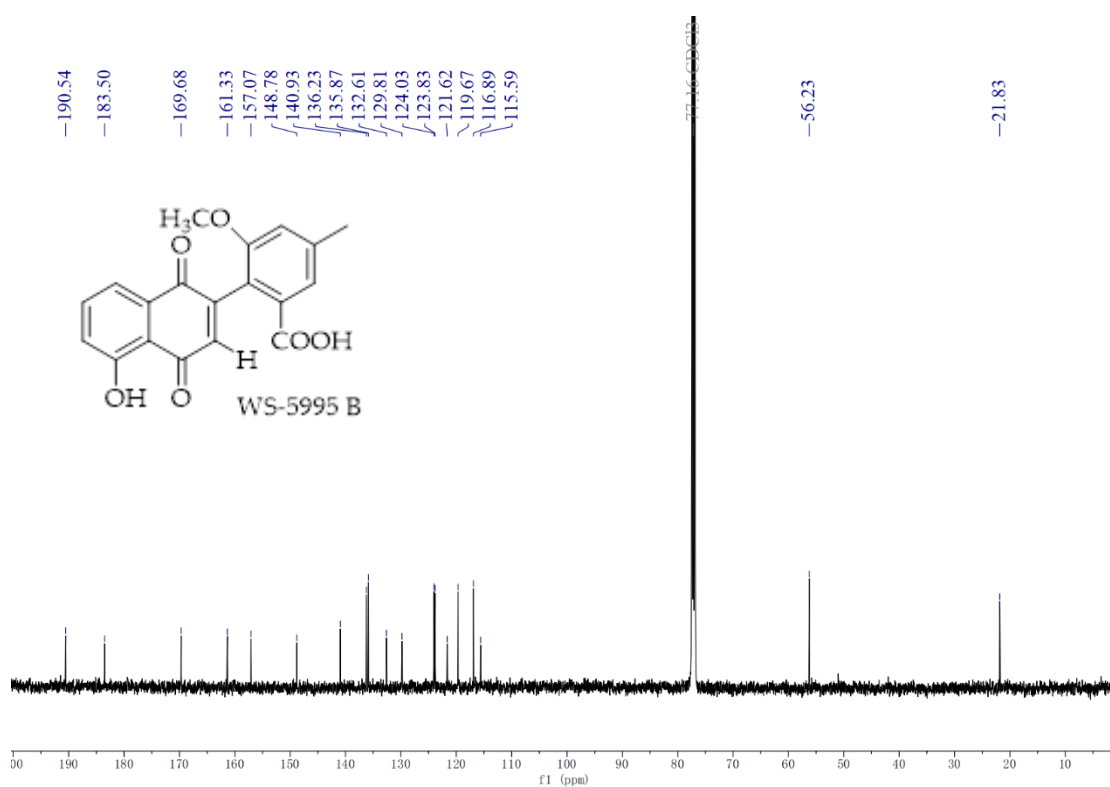

**Figure S16.** <sup>13</sup>C NMR (175 MHz, CDCl<sub>3</sub>) spectrum of WS-5995 B (3).

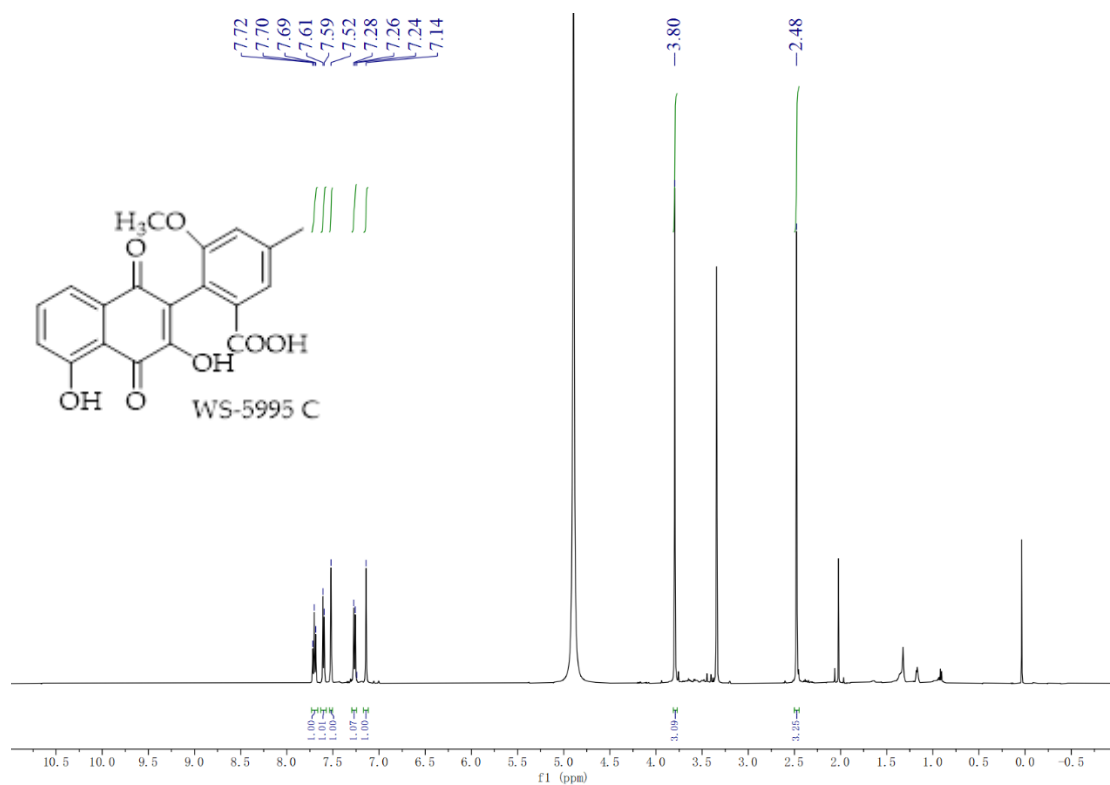

**Figure S17.** <sup>1</sup>H NMR (500 MHz, CD<sub>3</sub>OD) spectrum of WS-5995 C (4).

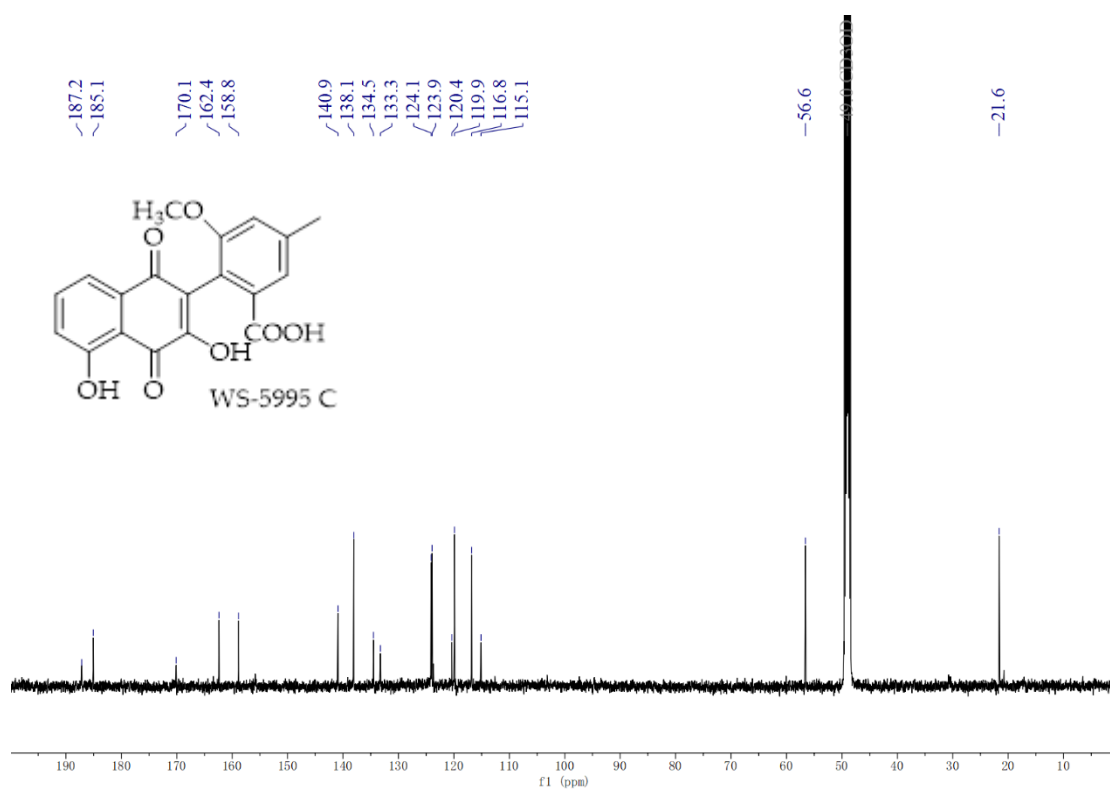

**Figure S18.** <sup>13</sup>C NMR (125 MHz, CD<sub>3</sub>OD) spectrum of WS-5995 C (4).

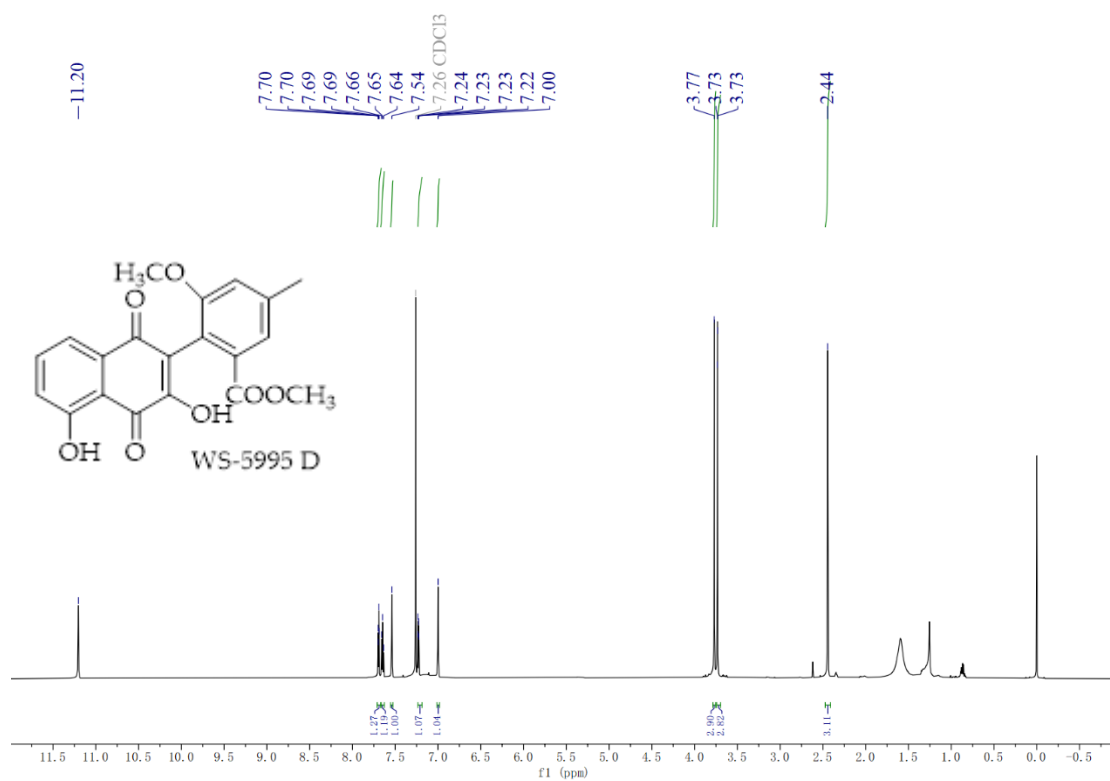

**Figure S19.** <sup>1</sup>H NMR (500 MHz, CDCl<sub>3</sub>) spectrum of WS-5995 D (5).

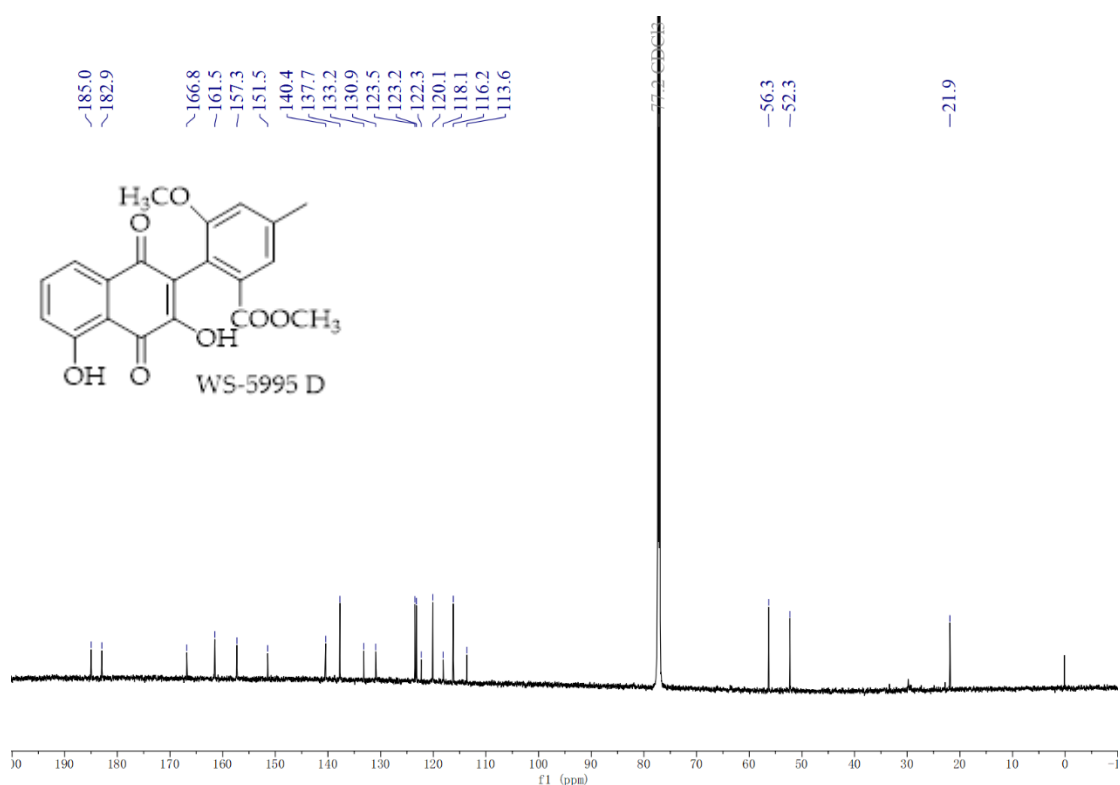

**Figure S20.**  $^{13}\text{C}$  NMR (125 MHz,  $\text{CDCl}_3$ ) spectrum of WS-5995 D (5).

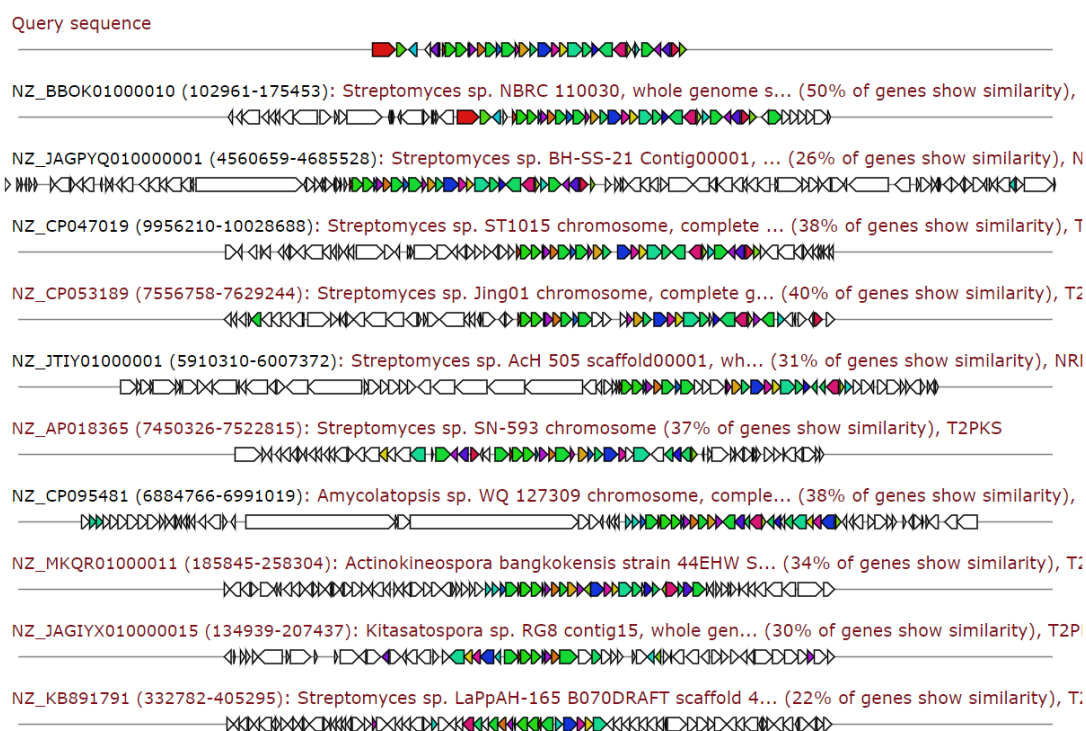

**Figure S21** Similar gene cluster to *wsm* in antiSMASH database



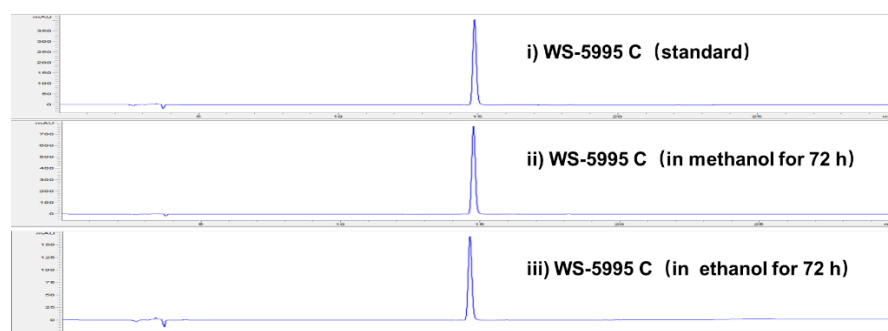

Figure S24 transformation of WS-5995 C.

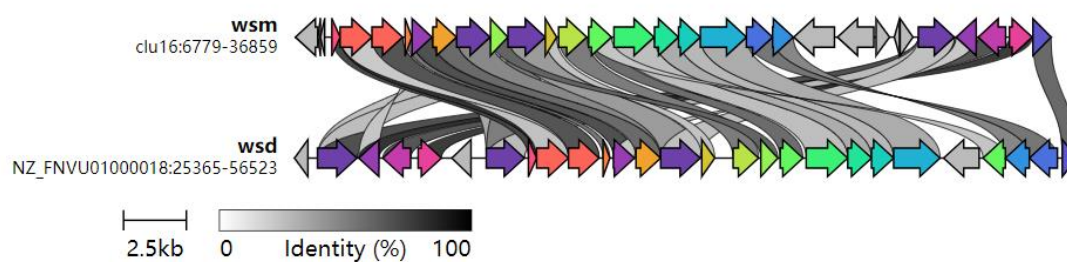

Figure S25 Comparison of *wsm* and *wsd* gene clusters using Clinker.

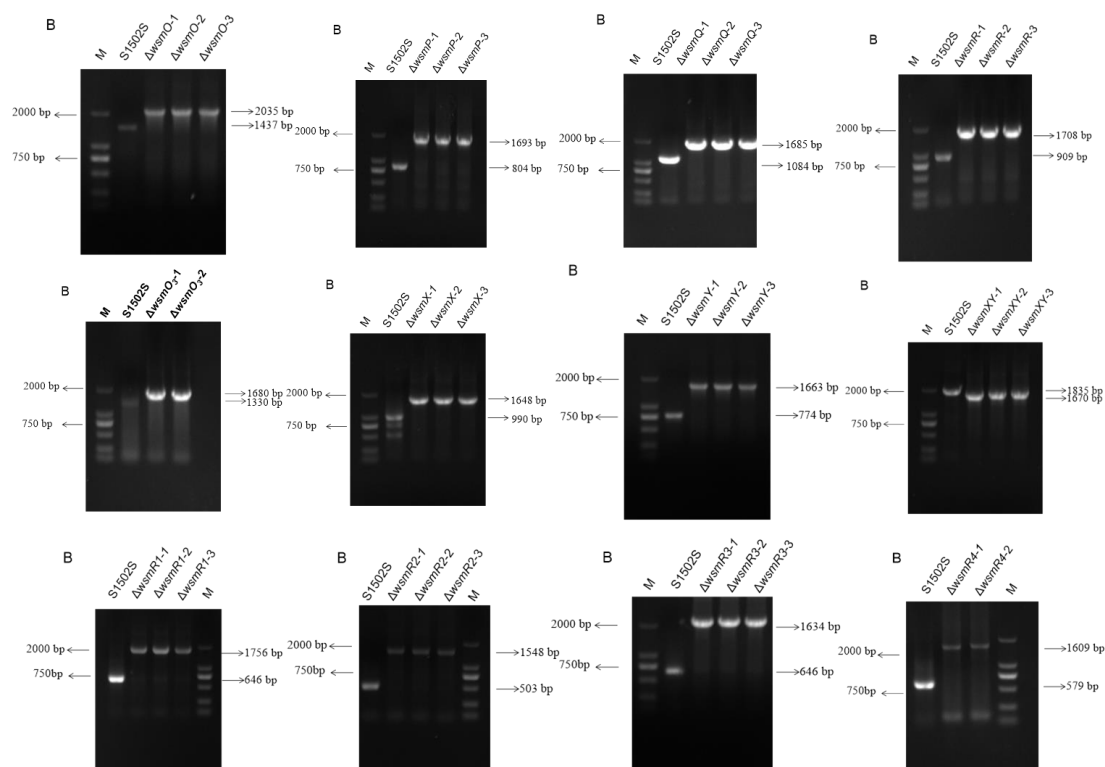

Figure S26 PCR verification of disruption of *genes of wsm* in *S. sp.* S1502/Δ*stp1* via PCR-targeting.



Reference:

1. Wang, Y.; He, J.; Alam, M. S.; Wang, F.; Shang, Z.; Chen, Y.; Sun, C.; Lu, Z.; Gao, Y.; Zhang, T.; Ju, J.; Ma, J., Efficient mutasynthesis of “non-natural” antitubercular ilamycins with low cytotoxicity. *ACS Synthetic Biology* **2024**, 13, (3), 930-941.
2. Luo, M.; Wang, Y.H.; Frisch, D.; Joobeur, T.; Wing, R.A.; Dean, R.A. Melon bacterial artificial chromosome (BAC) library construction using improved methods and identification of clones linked to the locus conferring resistance to melon Fusarium wilt (Fom-2). *Genome* **2001**, 44, 154–162.
